# Supplementary material for: Targeted inhibition of Focal Adhesion Kinase Attenuates Cardiac Fibrosis and Preserves Heart Function in Adverse Cardiac Remodeling
Source: PubMed Central journal article supplement (PMC5320468; doi:10.1038/srep43146), 2017-02-22

Targeted inhibition of Focal Adhesion Kinase Attenuates Cardiac  
Fibrosis and Preserves Heart Function in Adverse Cardiac Remodeling

Jie Zhang<sup>1</sup>, Guangpu Fan<sup>2</sup>, Hui Zhao<sup>1</sup>, Zhiwei Wang<sup>1</sup>, Fei Li<sup>1</sup>, Peide  
Zhang<sup>1</sup>, Jing Zhang<sup>1</sup>, Xu Wang<sup>1</sup>, Wei Wang<sup>1\*</sup>

## **Supplementary Information**

**Supplementary Figure S1 Original blots used in the figure 1(1a, 1b)**

**Supplementary Figure S2 Original blots used in the figure 2a**

**Supplementary Figure S3 Original blots used in the figure 3a**

**Supplementary Figure S5 Original blots used in the figure 5a**

**Supplementary Figure S6 Multiple exposures of original blots used in the main  
figures**

**Supplementary Figure S1a**

p-FAK 125KDa

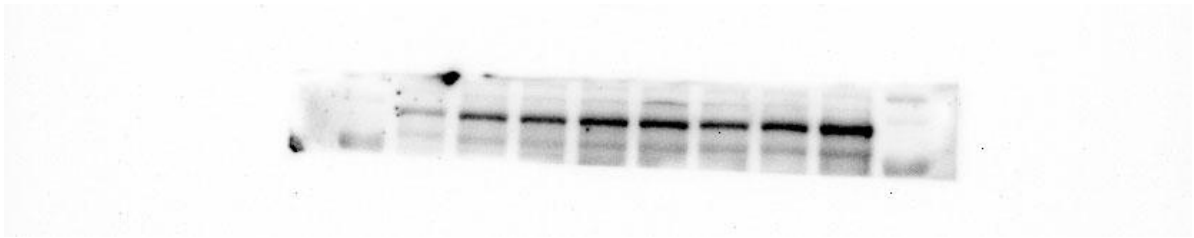

t-FAK 125KDa

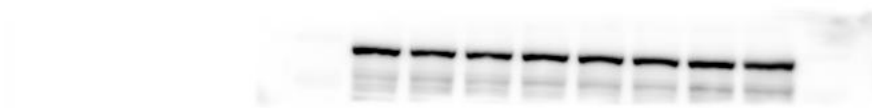

$\alpha$ -SMA 42KDa

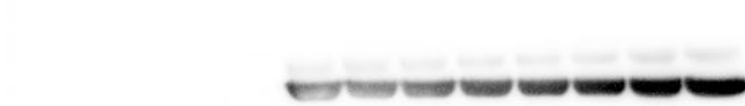

Vimentin 54KDa

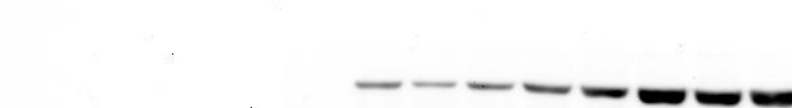

GAPDH 37KDa

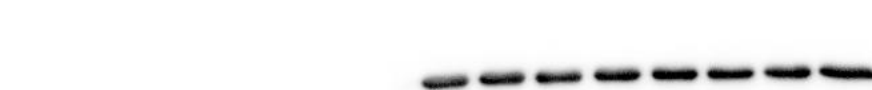

**Supplementary Figure S 1b**

P-FAK (PF-573,228 concentration) 125KDa

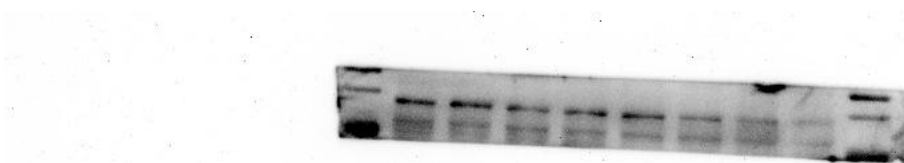

t-FAK (PF-573,228 concentration) 125KDa

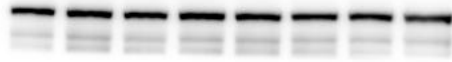

GAPDH(PF-573,228 concentration) 37KDa

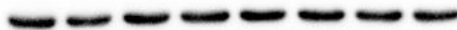

**Supplementary Figure S2**

p-FAK 125KDa

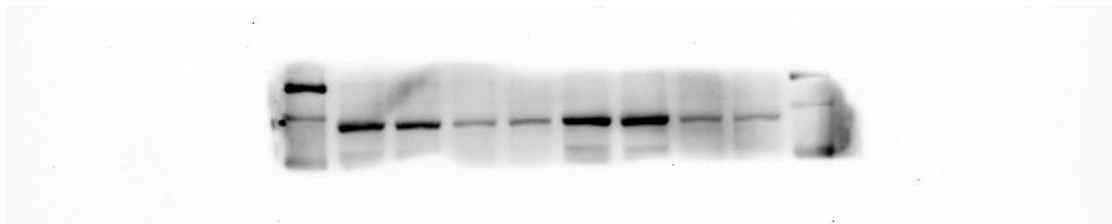

t-FAK 125KDa

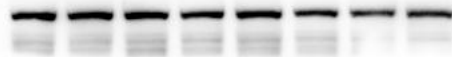

Vimentin 54KDa

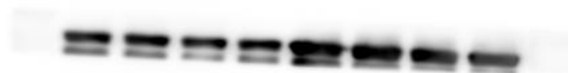

$\alpha$ -SMA 42KDa

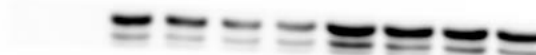

GAPDH 37KDa

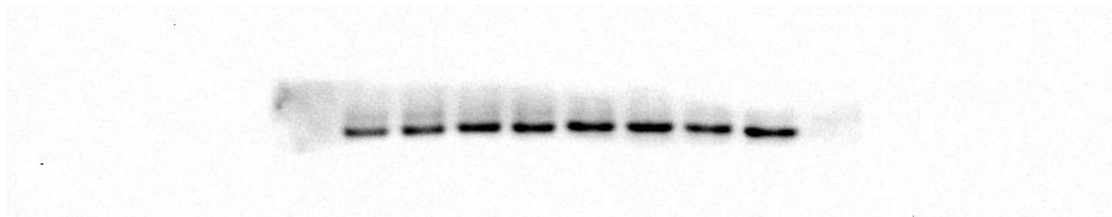

**Supplementary Figure S3**

Collagen-1 130KDa

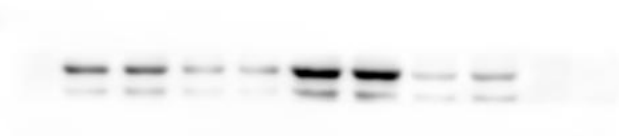

Fibronectin 262 KDa

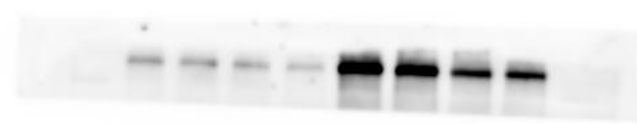

Laminin 250KDa

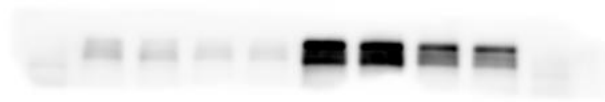

LOX 262 KDa

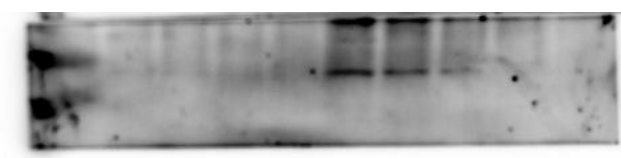

GAPDH 37 KDa

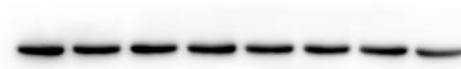

**Supplementary Figure S5a**

p-P70s6k 70, 85 KDa

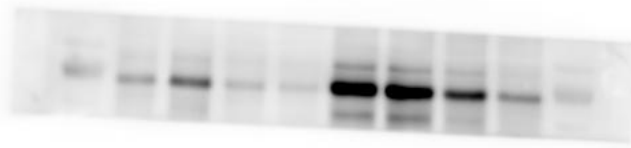

t-P70S6K 70, 85 KDa

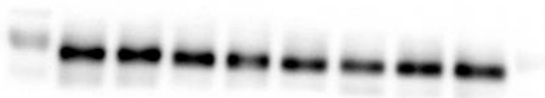

p-Akt 60 KDa

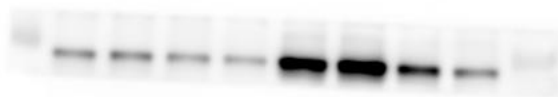

T-AKT 60 KDa

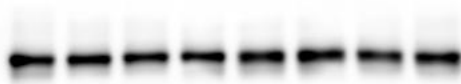

p-mTOR 289 KDa

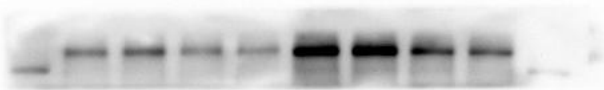

t-mTOR 289KDa

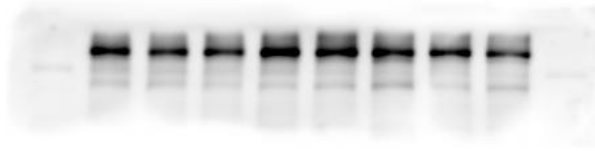

p-ERK 42, 44 KDa

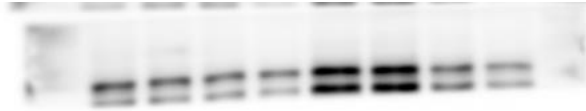

t-ERK 42, 44 KDa

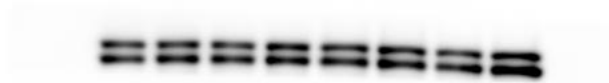

GAPDH 37 KDa

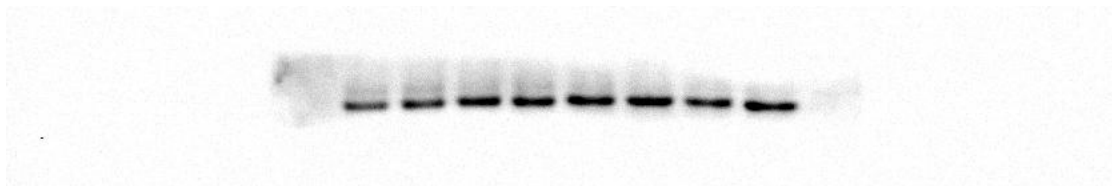

### Supplementary Figure S6

LOX 262 KDa Exposure time: 1min

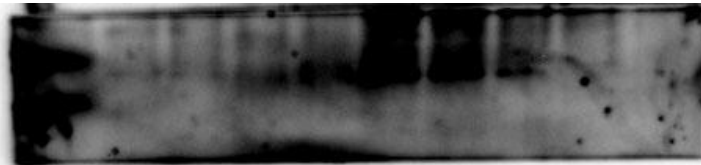

LOX 262 KDa Exposure time: 2min14s

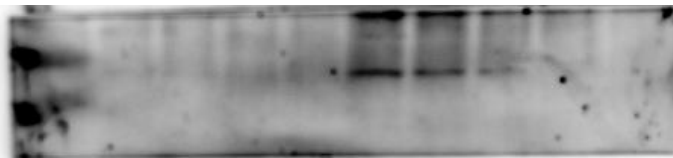

Vimentin 54KDa Exposure time: 54s

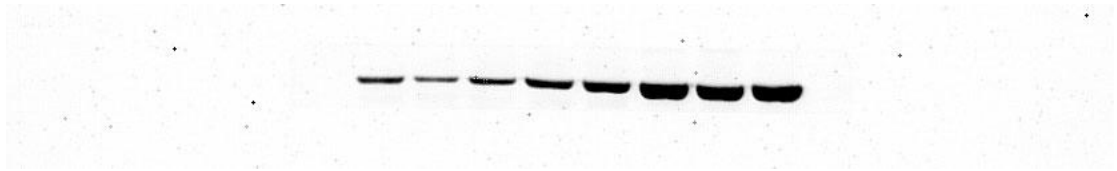

Vimentin 54KDa Exposure time: 1min36s

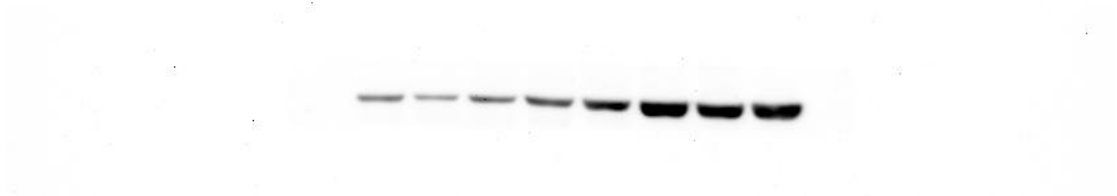

GAPDH 37KDa Exposure time: 54s

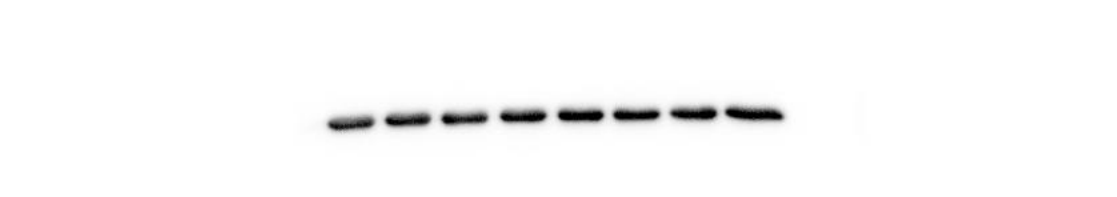

GAPDH 37KDa Exposure time: 1min36s

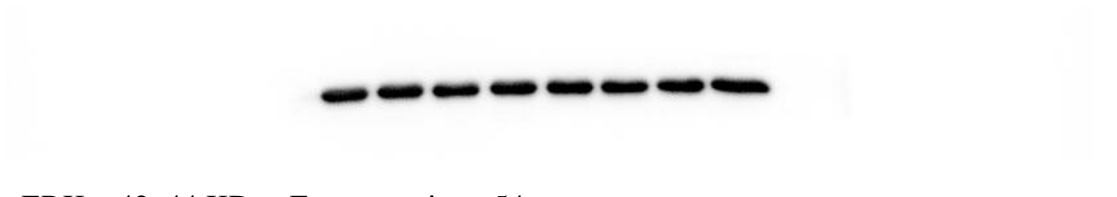

t-ERK 42, 44 KDa Exposure time: 54s

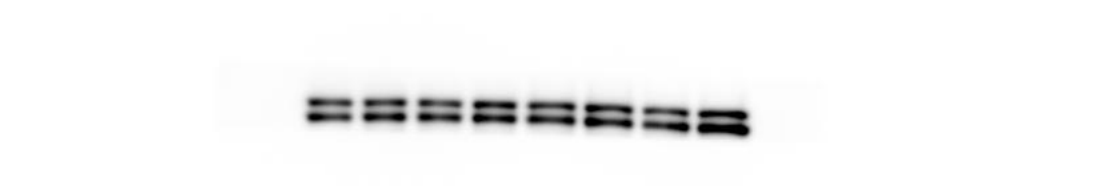

t-ERK 42, 44 KDa Exposure time: 1min36s

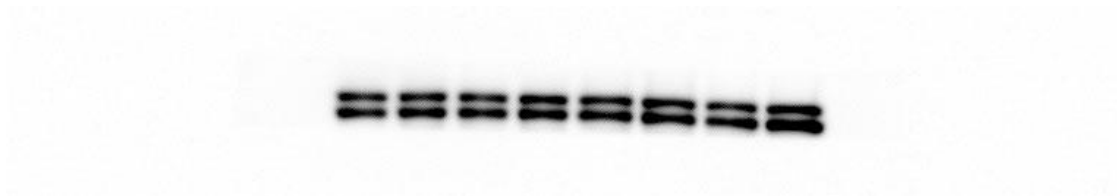

Supplement: srep43146-s2.pdf [file srep43146-s2.pdf]
