# Supplementary material for: Targeted inhibition of Focal Adhesion Kinase Attenuates Cardiac Fibrosis and Preserves Heart Function in Adverse Cardiac Remodeling
Source: PubMed Central journal article supplement (PMC5320468; doi:10.1038/srep43146), 2017-02-22
Supplement: srep43146-s1.pdf [file srep43146-s1.pdf]

Targeted inhibition of Focal Adhesion Kinase Attenuates Cardiac  
Fibrosis and Preserves Heart Function in Adverse Cardiac Remodeling

Jie Zhang<sup>1</sup>, Guangpu Fan<sup>2</sup>, Hui Zhao<sup>1</sup>, Zhiwei Wang<sup>1</sup>, Fei Li<sup>1</sup>, Peide  
Zhang<sup>1</sup>, Jing Zhang<sup>1</sup>, Xu Wang<sup>1</sup>, Wei Wang<sup>1\*</sup>

## **Supplementary Information**

**Supplementary table S1** the description and dilute concentration of the antibody used in this study

**Supplementary table S2** Primer sequences and product sizes for predicted genes

**Supplementary table S3** Echocardiographic analysis at the 7th day after MI

**Supplementary table S4** Echocardiographic analysis at the first month after treatment

**Supplementary table S5** Echocardiographic analysis at the second month after treatment

**Supplementary table S6** Echocardiographic analysis at the third month after treatment

**Supplementary table S2 the dilute concentration of the antibody used in this study**

|                                                                           | <b>Purchased from</b> | <b>Description</b> | <b>Dilution</b>                     |
|---------------------------------------------------------------------------|-----------------------|--------------------|-------------------------------------|
| <b>Collagen I</b>                                                         | Abcam(34710)          | Rabbit/ polyclonal | WB 1:1000<br>IHC 1:1500<br>IF 1:200 |
| <b>Collagen III</b>                                                       | Abcam(7778)           | Rabbit/ polyclonal | IHC 1:500<br>IF 1:200               |
| <b>Fibronectin</b>                                                        | Abcam(2413)           | Rabbit/ polyclonal | WB 1:1000<br>IHC 1:500<br>IF 1:150  |
| <b>Elastin</b>                                                            | Abcam(21610)          | Rabbit/ polyclonal | IHC 1:500<br>IF 1:200               |
| <b>p-FAK</b>                                                              | Abcam(81298)          | Rabbit/ monoclonal | IF 1:200                            |
| <b>p-FAK</b>                                                              | CST(3283)             | Rabbit/ polyclonal | WB 1:1000                           |
| <b>FAK</b>                                                                | CST(3285)             | Rabbit/ polyclonal | IHC 1:100<br>WB 1:1000              |
| <b>Vimentin</b>                                                           | Abcam(8978)           | Mouse/ monoclonal  | IF: 1:200                           |
| <b>Vimentin</b>                                                           | Abcam(92547)          | Rabbit/ polyclonal | WB 1:1000                           |
| <b><math>\alpha</math> -SMA</b>                                           | Abcam(5694)           | Rabbit/ polyclonal | WB 1:1000                           |
| <b><math>\alpha</math> -SMA</b>                                           | Abcam(7817)           | Mouse/ monoclonal  | WB 1:200                            |
| <b>LOX</b>                                                                | Abcam(31238)          | Rabbit/ polyclonal | WB 1:500                            |
| <b>t-P70/S6K</b>                                                          | CST (9234s)           | Rabbit/ polyclonal | WB 1:1000                           |
| <b>p-P70/S6K</b>                                                          | CST (2708s)           | Rabbit/ polyclonal | WB 1:1000                           |
| <b>p-AKT</b>                                                              | CST (4060s)           | Rabbit/ polyclonal | WB 1:1000                           |
| <b>t-AKT</b>                                                              | CST (4691s)           | Rabbit/ polyclonal | WB 1:1000                           |
| <b>p-mTOR</b>                                                             | CST (2974p)           | Rabbit/ polyclonal | WB 1:1000                           |
| <b>t-mTOR</b>                                                             | CST (2983p)           | Rabbit/ polyclonal | WB 1:1000                           |
| <b>p-ERK1/2</b>                                                           | CST (4377)            | Rabbit/ polyclonal | WB 1:1000                           |
| <b>t-ERK1/2</b>                                                           | CST (4695)            | Rabbit/ polyclonal | WB 1:1000                           |
| <b>GAPDH</b>                                                              | ZSGB-BIO(TA336621)    | mouse/ monoclonal  | WB 1:1000                           |
| <b>Anti-Rabbit IgG<br/>H&amp;L (Alexa Fluor®<br/>488)</b>                 | Abcam (150077)        | Goat/ Polyclonal   | IF 1:400                            |
| <b>Alexa Fluor® 488<br/>AffiniPure Goat<br/>Anti-Mouse IgG<br/>(H+L)</b>  | Jackson(115545003)    | Goat/ Polyclonal   | IF 1:400                            |
| <b>Alexa Fluor® 594<br/>AffiniPure Goat<br/>Anti-Rabbit IgG<br/>(H+L)</b> | Jackson(111585003)    | Goat/ Polyclonal   | IF 1:400                            |

**Supplementary table S2 : Primer sequences and product sizes for predicted genes**

| <b>Gene</b>                     | <b>Primer</b> | <b>Sequence (5' to 3')</b> | <b>Length</b> |
|---------------------------------|---------------|----------------------------|---------------|
| <b>FAK</b>                      | Forward       | GGCTGTCATCGAGATGTCCA       | 114bp         |
|                                 | Reverse       | TTCATCCACCGTGGCTAGT        |               |
| <b>Vimentin</b>                 | Forward       | ATTTCTCTGCCTCTGCCAAC       | 113bp         |
|                                 | Reverse       | CAACCGTCTTAATCAGGAGTGT     |               |
| <b><math>\alpha</math>-SMA</b>  | Forward       | TACCACCATGTACCCAGGCA       | 152bp         |
|                                 | Reverse       | GAAGGTAGACAGCGAAGCCA       |               |
| <b>cta</b>                      | Forward       | GACGAGATGGCATCCCTG         | 141bp         |
|                                 | Reverse       | CACGGAAACTCCAGCTGATT       |               |
| <b>LOX</b>                      | Forward       | CCACAGCATGGACGAATTCA       | 191bp         |
|                                 | Reverse       | GTCTGCCGCATAGGTGTCAT       |               |
| <b>Fibronectin</b>              | Forward       | ACATGTCAGACCTGCCTTGG       | 121bp         |
|                                 | Reverse       | GGTGAGATTGAAGTGGGAGC       |               |
| <b>Laminin</b>                  | Forward       | TGTGAGCTGTGTGCTTCTGG       | 139bp         |
|                                 | Reverse       | GCACCGGAAATCACTGTCAC       |               |
| <b>Elastin</b>                  | Forward       | CTAAAGCAGCCGCCAAAG         | 150bp         |
|                                 | Reverse       | AGGACCAGCTCCAATACCAG       |               |
| <b><math>\beta</math>-actin</b> | Forward       | ACTCATCGTACTCCTGCTTGCT     | 130bp         |
|                                 | Reverse       | GCTAGGCATTTCCATCTTCA       |               |

**Supplementary table S3 Echocardiographic analysis at the 7th day after MI**

|                          | <b>Sham</b> | <b>Sham +PF</b> | <b>MI</b>     | <b>MI+PF</b>              |
|--------------------------|-------------|-----------------|---------------|---------------------------|
| <b>LVEF</b>              | 68.82±2.15  | 67.73±2.30      | 48.05±1.74*   | 43.96±1.40 <sup>#</sup>   |
| <b>FS</b>                | 38.25±1.66  | 37.64±1.73      | 24.26±1.06*   | 21.99±0.81 <sup>#</sup>   |
| <b>LV mass</b>           | 152.93±9.08 | 175.49±10.27    | 143.04±10.12  | 167.44±14.64              |
| <b>LV mass (correct)</b> | 122.34±7.26 | 140.39±8.21     | 114.43±8.09   | 133.95±11.72              |
| <b>LV Vol; d</b>         | 73.72 ±7.02 | 88.34 ±5.67     | 105.72 ±3.41* | 138.64 ±6.70 <sup>#</sup> |
| <b>LV Vol; s</b>         | 23.34±3.57  | 28.92±3.54      | 55.10±3.06*   | 78.21±5.17 <sup>#</sup>   |
| <b>LVAW,s</b>            | 1.61±0.05   | 1.71±0.06       | 0.87±0.11*    | 0.67±0.13                 |
| <b>LVAW, d</b>           | 1.01±0.04   | 1.07±0.04       | 0.67±0.07*    | 0.51±0.09                 |
| <b>LVID, d</b>           | 4.07±0.16   | 4.40±0.12       | 4.76±0.06*    | 5.34±0.11 <sup>#</sup>    |
| <b>LVID,s</b>            | 2.52±0.14   | 2.75±0.14       | 3.61±0.08*    | 4.17±0.12 <sup>#</sup>    |
| <b>LVPW, d.</b>          | 0.89±0.03   | 0.84±0.04       | 0.81±0.03     | 0.92±0.06                 |
| <b>LVPW,s</b>            | 1.38±0.07   | 1.28±0.08       | 1.25±0.04     | 1.46±0.07 <sup>#</sup>    |

Table 3. Echocardiographic analysis at the 7th day after MI model were established, Values are means ± SEM of three separate M-mode measurements. LVEF: left ventricular ejection fraction; FS: fractional shortening; LV mass : left ventricular mass; LV Vol; s: systolic left ventricular volume; LV Vol;d :diastolic left ventricular volume; LVAW,s : systolic left ventricular anterior wall; LVAW,d: diastolic left ventricular posterior wall; LVID,d: diastolic left ventricular internal dimension; LVID,s : systolic left ventricular internal dimension; LVPW,d: diastolic left ventricular posterior wall; LVPW,s: systolic left ventricular posterior wall.\* p<0.05 vs. Sham & Sham+PF; <sup>#</sup>P< 0.05 vs. MI.

**Supplementary table S4 Echocardiographic analysis at the first month after treatment**

|                          | Sham         | Sham +PF    | MI            | MI+PF                    |
|--------------------------|--------------|-------------|---------------|--------------------------|
| <b>LVEF</b>              | 68.48±3.80   | 65.84±2.34  | 18.89±1.33*   | 27.87±1.31 <sup>#</sup>  |
| <b>FS</b>                | 38.26±3.12   | 36.08±1.78  | 8.73±0.64*    | 13.21±0.67 <sup>#</sup>  |
| <b>LV mass</b>           | 160.07±12.60 | 166.37±7.03 | 155.18±20.37  | 193.88±19.59             |
| <b>LV mass (correct)</b> | 128.06±10.08 | 133.10±5.63 | 126.31±15.88  | 155.10±15.67             |
| <b>LV Vol; d</b>         | 67.70±7.31   | 81.62±5.67  | 179.54±17.29* | 162.46±7.88              |
| <b>LV Vol; s</b>         | 22.23±4.56   | 27.87±2.57  | 146.01±14.80* | 117.51±6.79 <sup>#</sup> |
| <b>LVAW,s</b>            | 1.72±0.11    | 1.64±0.06   | 0.49±0.04*    | 0.45±0.07 <sup>#</sup>   |
| <b>LVAW, d</b>           | 1.16±0.07    | 1.06±0.06   | 0.41±0.03*    | 0.40±0.07                |
| <b>LVID, d</b>           | 3.92±0.18    | 4.26±0.13   | 5.94±0.25*    | 5.72±0.12                |
| <b>LVID,s</b>            | 2.43±0.21    | 2.72±0.11   | 5.42±0.24*    | 4.97±0.13                |
| <b>LVPW, d.</b>          | 0.88±0.07    | 0.86±0.04   | 0.70±0.06*    | 1.07±0.10 <sup>#</sup>   |
| <b>LVPW,s</b>            | 1.33±0.10    | 1.39±0.05   | 1.00±0.10*    | 1.40±0.10 <sup>#</sup>   |

Table 1. Echocardiographic analysis at the first month after implantation of the ALZET mini-osmotic pump, Values are means ± SEM of three separate M-mode measurements. LVEF: left ventricular ejection fraction; FS: fractional shortening; LV mass : left ventricular mass; LV Vol; s: systolic left ventricular volume; LV Vol;d :diastolic left ventricular volume; LVAW,s : systolic left ventricular anterior wall; LVAW,d: diastolic left ventricular posterior wall; LVID,d: diastolic left ventricular internal dimension; LVID,s : systolic left ventricular internal dimension;LVPW,d: diastolic left ventricular posterior wall; LVPW,s: systolic left ventricular posterior wall.\* p<0.05 vs. Sham & Sham+PF; <sup>#</sup>P< 0.05 vs. MI.

**Supplementary table S5 Echocardiographic analysis at the second month after treatment**

|                          | <b>Sham</b>  | <b>Sham +PF</b> | <b>MI</b>     | <b>MI+PF</b>              |
|--------------------------|--------------|-----------------|---------------|---------------------------|
| <b>LVEF</b>              | 70.48±2.12   | 75.52±2.08      | 15.26±2.21*   | 22.22±2.10 <sup>#</sup>   |
| <b>FS</b>                | 39.48±1.58   | 43.90±71        | 7.03±1.06*    | 10.39±1.04 <sup>#</sup>   |
| <b>LV mass</b>           | 161.11±19.19 | 174.51±12.26    | 170.62±17.86  | 144.38±19.24              |
| <b>LV mass (correct)</b> | 128.89±15.35 | 139.61±9.81     | 136.49±14.29  | 115.50±15.39              |
| <b>LV Vol; d</b>         | 68.19±7.46   | 68.32±68.32     | 194.65±12.14* | 171.30±14.64              |
| <b>LV Vol; s</b>         | 20.77±3.78   | 17.07±2.61      | 165.85±13.13* | 133.56±11.99 <sup>#</sup> |
| <b>LVAW,s</b>            | 1.55±0.06    | 1.91±0.06       | 0.37±0.04*    | 0.39±0.04                 |
| <b>LVAW, d</b>           | 1.02±0.05    | 1.19±0.05       | 0.34±0.05*    | 0.36±0.03                 |
| <b>LVID, d</b>           | 3.93±0.18    | 3.65±0.41       | 6.19±0.16*    | 5.83±0.22                 |
| <b>LVID,s</b>            | 2.39±0.17    | 2.22±0.13       | 5.76±0.19*    | 5.22±0.21 <sup>#</sup>    |
| <b>LVPW, d.</b>          | 1.01±0.07    | 0.96±0.04       | 0.84±0.10     | 0.73±0.08                 |
| <b>LVPW,s</b>            | 1.56±0.09    | 1.53±0.03       | 1.06±0.12*    | 0.98±0.12                 |

Table 1. Echocardiographic analysis at the second month after implantation of the ALZET mini-osmotic pump, Values are means ± SEM of three separate M-mode measurements. LVEF: left ventricular ejection fraction; FS: fractional shortening; LV mass : left ventricular mass; LV Vol; s: systolic left ventricular volume; LV Vol;d :diastolic left ventricular volume; LVAW,s : systolic left ventricular anterior wall; LVAW,d: diastolic left ventricular posterior wall; LVID,d: diastolic left ventricular internal dimension; LVID,s : systolic left ventricular internal dimension;LVPW,d: diastolic left ventricular posterior wall; LVPW,s: systolic left ventricular posterior wall.\* p<0.05 vs. Sham & Sham+PF; <sup>#</sup>P< 0.05 vs. MI.

**Supplementary table S6 Echocardiographic analysis at the third month after treatment**

|                          | <b>Sham</b>  | <b>Sham +PF</b> | <b>MI</b>     | <b>MI+PF</b>              |
|--------------------------|--------------|-----------------|---------------|---------------------------|
| <b>LVEF</b>              | 68.93±2.67   | 71.43±4.66      | 12.42±0.88*   | 22.30±1.62 <sup>#</sup>   |
| <b>FS</b>                | 38.44±2.06   | 41.05±3.71      | 5.67±0.41*    | 10.58±0.74 <sup>#</sup>   |
| <b>LV mass</b>           | 159.48±3.72  | 160.88±18.07    | 154.04±23.37  | 155.95±11.11              |
| <b>LV mass (correct)</b> | 127.59±10.97 | 128.70±14.46    | 123.23±18.70  | 124.76±8.89               |
| <b>LV Vol; d</b>         | 73.90±5.73   | 73.17±6.45      | 223.66±13.28* | 158.73±0.62 <sup>#</sup>  |
| <b>LV Vol; s</b>         | 23.11±2.82   | 21.83±4.69      | 196.45±13.05* | 123.72±10.43 <sup>#</sup> |
| <b>LVAW,s</b>            | 1.56±0.11    | 1.70±0.09       | 0.29±0.05*    | 0.42±0.07                 |
| <b>LVAW, d</b>           | 1.03±0.05    | 1.09±0.07       | 0.27±0.04*    | 0.38±0.05                 |
| <b>LVID, d</b>           | 4.08±0.13    | 4.06±0.15       | 6.58±0.18*    | 5.66±0.16 <sup>#</sup>    |
| <b>LVID,s</b>            | 2.51±0.12    | 2.41±0.22       | 6.21±0.19*    | 5.07±0.18 <sup>#</sup>    |
| <b>LVPW, d.</b>          | 0.91±0.04    | 0.86±0.06       | 0.70±0.11     | 0.87±0.07                 |
| <b>LVPW,s</b>            | 1.45±0.06    | 1.39±0.08       | 0.82±0.12*    | 1.12±0.09 <sup>#</sup>    |

Table 1. Echocardiographic analysis at the third month after implantation of the ALZET mini-osmotic pump, Values are means ± SEM of three separate M-mode measurements. LVEF: left ventricular ejection fraction; FS: fractional shortening; LV mass : left ventricular mass; LV Vol; s: systolic left ventricular volume; LV Vol;d :diastolic left ventricular volume; LVAW,s : systolic left ventricular anterior wall; LVAW,d: diastolic left ventricular posterior wall; LVID,d: diastolic left ventricular internal dimension; LVID,s : systolic left ventricular internal dimension;LVPW,d: diastolic left ventricular posterior wall; LVPW,s: systolic left ventricular posterior wall.\* p<0.05 vs. Sham & Sham+PF; <sup>#</sup>P< 0.05 vs. MI.
